# Supplementary material for: Nirmatrelvir-ritonavir for COVID-19
Source: PubMed Central journal article supplement — CMAJ. 2022 Feb 3;194(6):E218. doi: 10.1503/cmaj.220081 (PMC8900806; doi:10.1503/cmaj.220081), 2022-02-03
Supplement: 220081-five-1-at.pdf [file 220081-five-1-at.pdf]

## Appendix 1<sup>1</sup>: Examples of Major Drug-Drug Interactions with Nirmatrelvir-ritonavir and Co-administration Advice\*

| Interacting drug class       | Example medication(s)      | Type of interaction                                | Co-administration advice/mitigation strategy                                                                                                                                                                                                              |
|------------------------------|----------------------------|----------------------------------------------------|-----------------------------------------------------------------------------------------------------------------------------------------------------------------------------------------------------------------------------------------------------------|
| Antiarrhythmics              | Amiodarone,<br>Dronedarone | Increased toxicity<br>(CYP3A4 inhibition)          | <b>CANNOT BE MITIGATED</b><br><br>Do not co-administer due to risk of serious life-threatening arrhythmias. Amiodarone has a long half-life: stopping will not overcome this interaction.                                                                 |
|                              | Digoxin                    | Increased toxicity<br>(P-gp inhibition)            | <b>THERAPEUTIC DRUG MONITORING</b><br><br>Measure a digoxin level after 48-72 hours of co-administration and monitor for signs of toxicity; consider reducing dose by 50% during co-administration                                                        |
| Oral antithrombotic agents** | Rivaroxaban                | Increased toxicity<br>(P-gp and CYP3A4 inhibition) | <b>DO NOT CO-ADMINISTER</b><br><br>Very high increased risk of bleeding                                                                                                                                                                                   |
|                              | Apixaban                   | Increased toxicity<br>(P-gp and CYP3A4 inhibition) | <b>HOLD, REDUCE DOSE or DO NOT CO-ADMINISTER</b><br><br>Some product monographs suggest co-administration is possible if the thrombotic risk is low and apixaban dose can be reduced to 2.5 mg po BID <sup>1</sup><br><br>High increased risk of bleeding |
|                              | Edoxaban                   | Increased toxicity<br>(P-gp inhibition)            | <b>REDUCE DOSE and MONITOR CLINICALLY</b><br><br>Co-administration possible. If the thrombotic risk is low, consider a dose reduction to 30 mg po once daily<br><br>Moderate increased risk of bleeding                                                   |

|                        |                            |                                                                                              |                                                                                                                                                                                                                                                                         |
|------------------------|----------------------------|----------------------------------------------------------------------------------------------|-------------------------------------------------------------------------------------------------------------------------------------------------------------------------------------------------------------------------------------------------------------------------|
|                        | Dabigatran                 | Possible toxicity (Mixed P-gp inhibition and induction)                                      | <p>MONITOR CLINICALLY</p> <p>Co-administration possible. Monitor clinically for signs of bleeding.</p> <p>Increased risk of bleeding possible</p>                                                                                                                       |
|                        | Warfarin                   | Increased toxicity (CYP3A4 inhibition)                                                       | <p>THERAPEUTIC DRUG MONITORING</p> <p>Measure INR after 48-72 hours of co-administration and adjust dose; repeat INR 48-72 hours following completion of therapy</p> <p>Moderate increased risk of bleeding</p>                                                         |
|                        | Ticagrelor                 | Increased toxicity (CYP3A4 inhibition)                                                       | <p>DO NOT CO-ADMINISTER</p> <p>Do not co-administer due to high increased risk of bleeding. If the indication for ticagrelor is remote (e.g., &gt;3-6months) holding the drug may be an option</p> <p>Prasugrel can potentially be used as an alternative treatment</p> |
| Anticonvulsants        | Carbamazepine or Phenytoin | Reduced efficacy of nirmatrelvir-ritonavir (CYP3A4 induction by carbamazepine and phenytoin) | <p>CANNOT BE MITIGATED</p> <p>Do not co-administer. Potential development of virological resistance. Use an alternative treatment for COVID-19</p>                                                                                                                      |
| Neuropsychiatric drugs | Quetiapine                 | Increased toxicity (CYP3A4 inhibition)                                                       | <p>DO NOT CO-ADMINISTER</p> <p>Hold quetiapine if low dose (12.5-50mg daily) used for sleep or agitation</p> <p>For higher doses prescribed for a psychiatric condition, consult psychiatry and pharmacy.</p> <p>High risk of sedation</p>                              |
| Benzodiazepines        | Diazepam<br>Midazolam      | Increased toxicity (CYP3A4 inhibition)                                                       | <p>DO NOT CO-ADMINISTER</p> <p>Risk of extreme sedation and respiratory depression.</p>                                                                                                                                                                                 |

|                                  |                       |                                                                           |                                                                                                                                                                                                                                                                                      |
|----------------------------------|-----------------------|---------------------------------------------------------------------------|--------------------------------------------------------------------------------------------------------------------------------------------------------------------------------------------------------------------------------------------------------------------------------------|
|                                  |                       |                                                                           | Temporarily holding chronic, regular use benzodiazepines is not advisable as this can precipitate seizures in the absence of tapering.                                                                                                                                               |
| Opioids                          | Fentanyl              | Increased toxicity (CYP3A4 inhibition)                                    | DO NOT CO-ADMINISTER<br>Fatal respiratory depression can occur<br>Temporarily holding chronic, regular use opioids is not advisable as this can precipitate withdrawal in the absence of tapering.                                                                                   |
|                                  | Methadone             | Reduced effect (CYP3A4 induction)                                         | CLINICAL MONITORING<br>A preemptive dose increase is not needed but should be considered in patients reporting symptoms of withdrawal                                                                                                                                                |
| Immunosuppressants               | Tacrolimus            | Increased toxicity (CYP3A4 and P-gp substrate)                            | PHARMACIST CONSULTATION STRONGLY ADVISED<br>Substantial risk for rapid onset tacrolimus toxicity. Some experts suggest this is not easily mitigated even with substantial dose reductions and routine monitoring of levels.<br>Consider use of an alternative treatment for COVID-19 |
| Alpha1-Adrenoreceptor Antagonist | Alfuzosin, Tamsulosin | Increased toxicity (CYP3A4 inhibition)                                    | DO NOT CO-ADMINISTER<br>Hold alfuzosin or tamsulosin during and for 3-5 days post treatment.<br>Risk of significant hypotension                                                                                                                                                      |
| Other                            | Rifampin              | Reduced efficacy of nirmatrelvir-ritonavir (CYP3A4 induction by rifampin) | DO NOT CO-ADMINISTER<br>Potential for treatment failure and development of virological resistance.                                                                                                                                                                                   |

|  |                                                     |                                                                                                     |                                                                                                                                                                                                                                                             |
|--|-----------------------------------------------------|-----------------------------------------------------------------------------------------------------|-------------------------------------------------------------------------------------------------------------------------------------------------------------------------------------------------------------------------------------------------------------|
|  | Ethinyl estradiol containing hormonal contraception | May reduce efficacy of hormone-based contraceptives (Increased metabolism)                          | USE A BACK-UP<br>Non-hormonal method of contraception is recommended until the following cycle                                                                                                                                                              |
|  | Simvastatin, Atorvastatin, Lovastatin               | Risk of rhabdomyolysis or myopathy (CYP3A4 inhibition)                                              | DO NOT CO-ADMINISTER<br>Discontinue statin at least 12 hours prior to nirmatrelvir-ritonavir administration and resume 3-5 days post treatment completion or change to another low-potency statin such as pravastatin                                       |
|  | Colchicine                                          | Increased (fatal) toxicity especially in patients with renal or hepatic failure (CYP3A4 inhibition) | DO NOT CO-ADMINISTER<br>If used for gout, hold colchicine during and for 3-5 days after treatment. If the drug cannot be held (e.g., treatment of familial mediterranean fever) do not use nirmatrelvir-ritonavir.<br><br>Risk of fatal colchicine toxicity |

**\*This table is not an exhaustive list of drug-drug interactions.**

One of several free COVID-19 drug interaction guides is available at <https://www.covid19-druginteractions.org/checker>.

\*\*If holding or reducing the dose of an oral anticoagulant consultation with hematology, cardiology or internal medicine is advised.

We **strongly recommend** pharmacist consultation for patients receiving **concomitant HIV and/or Hepatitis C treatments, active chemotherapy, oral anticoagulants, or are a transplant recipient**. Likewise, if reducing quetiapine or other psychiatric medications prescribed for a psychiatric disorder such as bipolar affective disorder or schizophrenia, consultation with **the patient's mental health practitioner** is advisable.

**For all others**, expert **consultation** with a pharmacist and shared decision making with any subspecialists is **advisable** whenever possible to

- 1) Decrease risks of toxicity and 2) Increase the proportion of those eligible for timely treatment.

<sup>1</sup> [https://www.accessdata.fda.gov/drugsatfda\\_docs/label/2012/202155s000lbl.pdf](https://www.accessdata.fda.gov/drugsatfda_docs/label/2012/202155s000lbl.pdf)
